# Supplementary material for: Penile Cancer-Derived Cells Molecularly Characterized as Models to Guide Targeted Therapies
Source: MDPI journal article supplement (doi:10.3390/cells10040814), 2021-04-06
Supplement: s1 [file s1]

**Table S1.** Genomic alterations shared in primary tumors and their derived PeCa cells.

| <i>Cell</i> | <i>Type</i> | <i>Chro</i> | <i>Start Cell</i> | <i>End Cell</i> | <i>Size (kbp)<br/>Cell</i> | <i>Start Tumor</i> | <i>End Tumor</i> | <i>Size (kbp)<br/>Tumor</i> | <i>Shared Size<br/>(kbp)</i> |
|-------------|-------------|-------------|-------------------|-----------------|----------------------------|--------------------|------------------|-----------------------------|------------------------------|
| Cell2       | Gain        | 1           | 155013337         | 155219172       | 205.835                    | 154972478          | 155236611        | 264.133                     | 205.835                      |
|             | Gain        | 3           | 113898632         | 113976795       | 78.163                     | 113898632          | 113976795        | 78.163                      | 78.163                       |
|             | Gain        | 5           | 113576            | 55275365        | 55161.789                  | 113576             | 55275365         | 55161.789                   | 55161.789                    |
|             | Gain        | 5           | 118271056         | 118573297       | 302.241                    | 118271055          | 118573297        | 302.242                     | 302.241                      |
|             | Gain        | 5           | 119305848         | 180375290       | 61069.442                  | 119305848          | 180375290        | 61069.442                   | 61069.442                    |
|             | Gain        | 5           | 180418331         | 180719789       | 301.458                    | 180418331          | 180719789        | 301.458                     | 301.458                      |
|             | Gain        | 7           | 1123531           | 1566553         | 443.022                    | 1124365            | 1562971          | 438.606                     | 438.606                      |
|             | Gain        | 14          | 106329183         | 106948691       | 619.508                    | 106251082          | 107000205        | 749.123                     | 619.508                      |
|             | Gain        | 19          | 15779383          | 15833442        | 54.059                     | 15780040           | 15833442         | 53.402                      | 53.402                       |
|             | GainMosaic  | 20          | 61568             | 62915555        | 62853.987                  | 61568              | 62915555         | 62853.987                   | 62853.987                    |
|             | cnLOH       | 2           | 15702             | 68326904        | 68311.202                  | 15702              | 68326904         | 68311.202                   | 68311.202                    |
|             | cnLOH       | 9           | 192128            | 9261737         | 9069.609                   | 192128             | 9317368          | 9125.24                     | 9069.609                     |
|             | cnLOH       | 9           | 9308229           | 9785124         | 476.895                    | 192128             | 9317368          | 9125.24                     | 9.139                        |
|             | cnLOH       | 9           | 9793284           | 21682759        | 11889.475                  | 9821782            | 21580763         | 11758.981                   | 11758.981                    |
|             | cnLOH       | 9           | 22067829          | 27413212        | 5345.383                   | 22067829           | 27413212         | 5345.383                    | 5345.383                     |
|             | Loss        | 2           | 133582740         | 133750167       | 167.427                    | 133576817          | 133750167        | 173.35                      | 167.427                      |
|             | Loss        | 2           | 133952092         | 134007875       | 55.783                     | 133952092          | 134007875        | 55.783                      | 55.783                       |
|             | Loss        | 4           | 69435888          | 69485827        | 49.939                     | 69435888           | 69485827         | 49.939                      | 49.939                       |
|             | Loss        | 5           | 180378753         | 180418090       | 39.337                     | 180378753          | 180418090        | 39.337                      | 39.337                       |
|             | Loss        | 9           | 9308229           | 9785124         | 476.895                    | 9308229            | 9785124          | 476.895                     | 476.895                      |
|             | Loss        | 9           | 21720480          | 22065883        | 345.403                    | 21720480           | 22065883         | 345.403                     | 345.403                      |
|             | Loss        | 13          | 106229317         | 106307269       | 77.952                     | 106229317          | 106307349        | 78.032                      | 77.952                       |
|             | Loss        | X           | 29318639          | 29347245        | 28.606                     | 29318639           | 29347245         | 28.606                      | 28.606                       |
|             | Loss        | X           | 32683887          | 32704020        | 20.133                     | 32683887           | 32704020         | 20.133                      | 20.133                       |
| Cell3       | Gain        | 3           | 93923641          | 197851986       | 103928.345                 | 100340054          | 100442497        | 102.443                     | 102.443                      |
|             | Gain        | 3           | 100340054         | 100442497       | 102.443                    | 100340054          | 100442497        | 102.443                     | 102.443                      |
|             | Gain        | 4           | 55102558          | 55174489        | 71.931                     | 55103916           | 55181915         | 77.999                      | 70.573                       |
|             | Gain        | 7           | 62659911          | 159119707       | 96459.796                  | 143425718          | 144075390        | 649.672                     | 649.672                      |
|             | Gain        | 7           | 143157525         | 144123083       | 965.558                    | 143425718          | 144075390        | 649.672                     | 649.672                      |
|             | Gain        | 14          | 106079822         | 106717343       | 637.521                    | 106227153          | 106717343        | 490.19                      | 490.19                       |
|             | Gain        | 16          | 1002185           | 1444729         | 442.544                    | 1052879            | 1288498          | 235.619                     | 235.619                      |
|             | Gain        | 22          | 22929813          | 23262943        | 333.13                     | 23124497           | 23262943         | 138.446                     | 138.446                      |
|             | Gain        | X           | 148876306         | 149026550       | 150.244                    | 148884122          | 149028748        | 144.626                     | 142.428                      |
|             | GainMosaic  | 5           | 113576            | 39317327        | 39203.751                  | 113576             | 8894499          | 8780.923                    | 8780.923                     |
|             | cnLOH       | 1           | 43878711          | 61457297        | 17578.586                  | 42956395           | 61368779         | 18412.384                   | 17490.068                    |
|             | cnLOH       | 1           | 68692743          | 85917563        | 17224.82                   | 68623008           | 85940105         | 17317.097                   | 17224.82                     |
|             | cnLOH       | 2           | 115794768         | 128641375       | 12846.607                  | 115294660          | 128856553        | 13561.893                   | 12846.607                    |
|             | cnLOH       | 7           | 43360             | 58025873        | 57982.513                  | 42001908           | 47626513         | 5624.605                    | 5624.605                     |

|       |            |    |           |           |           |           |           |            |           |
|-------|------------|----|-----------|-----------|-----------|-----------|-----------|------------|-----------|
|       | cnLOH      | 7  | 42030332  | 47544242  | 5513.91   | 42001908  | 47626513  | 5624.605   | 5513.91   |
|       | cnLOH      | 7  | 62659911  | 159119707 | 96459.796 | 90820629  | 107313947 | 16493.318  | 16493.318 |
|       | cnLOH      | 7  | 90924002  | 107313727 | 16389.725 | 90820629  | 107313947 | 16493.318  | 16389.725 |
|       | cnLOH      | 9  | 72007158  | 141020389 | 69013.231 | 133621503 | 141025328 | 7403.825   | 7398.886  |
|       | cnLOH      | 9  | 135205005 | 141025328 | 5820.323  | 133621503 | 141025328 | 7403.825   | 5820.323  |
|       | cnLOH      | 16 | 84052661  | 90163275  | 6110.614  | 83896234  | 90163275  | 6267.041   | 6110.614  |
|       | cnLOH      | 17 | 14772900  | 21076194  | 6303.294  | 14767823  | 21431579  | 6663.756   | 6303.294  |
|       | Loss       | 6  | 156974    | 57898477  | 57741.503 | 254253    | 314949    | 60.696     | 60.696    |
|       | Loss       | 6  | 253196    | 294826    | 41.63     | 254253    | 314949    | 60.696     | 40.573    |
|       | Loss       | 7  | 43360     | 58025873  | 57982.513 | 11976266  | 12098696  | 122.43     | 122.43    |
|       | Loss       | 7  | 11976266  | 12098696  | 122.43    | 11976266  | 12098696  | 122.43     | 122.43    |
|       | Loss       | 8  | 158048    | 42360978  | 42202.93  | 39247097  | 39386952  | 139.855    | 139.855   |
|       | Loss       | 16 | 16248154  | 16257822  | 9.668     | 16248154  | 16258276  | 10.122     | 9.668     |
|       | LossMosaic | 9  | 21565673  | 27885795  | 6320.122  | 19740519  | 28296201  | 8555.682   | 6320.122  |
| Cell4 | Gain       | 14 | 106072250 | 106728149 | 655.899   | 106401470 | 107081338 | 679.868    | 326.679   |
|       | cnLOH      | 5  | 39434096  | 45181612  | 5747.516  | 8501227   | 166435481 | 157934.254 | 5747.516  |
|       | Loss       | 5  | 115586676 | 115625244 | 38.568    | 8501227   | 166435481 | 157934.254 | 38.568    |
|       | Loss       | 11 | 5788078   | 5809230   | 21.152    | 5754065   | 5868830   | 114.765    | 21.152    |
| Cell5 | Gain       | 3  | 85614312  | 85723256  | 108.944   | 85619047  | 85731498  | 112.451    | 104.209   |
|       | Gain       | 5  | 39434096  | 45181612  | 5747.516  | 20432744  | 42559770  | 22127.026  | 3125.674  |
|       | Gain       | 14 | 106072250 | 106728149 | 655.899   | 106281952 | 107093267 | 811.315    | 446.197   |
|       | Gain       | 17 | 44212823  | 44784639  | 571.816   | 44212823  | 44789621  | 576.798    | 571.816   |
|       | GainMosaic | 5  | 39434096  | 45181612  | 5747.516  | 113576    | 42903265  | 42789.689  | 3469.169  |
|       | GainMosaic | 12 | 2235940   | 2257908   | 21.968    | 173786    | 25391893  | 25218.107  | 21.968    |
|       | GainMosaic | 14 | 48227023  | 48277484  | 50.461    | 20511672  | 53979814  | 33468.142  | 50.461    |
|       | GainMosaic | X  | 7684969   | 7690004   | 5.035     | 168546    | 9346320   | 9177.774   | 5.035     |
|       | Loss       | 5  | 115586676 | 115625244 | 38.568    | 115586765 | 115625174 | 38.409     | 38.409    |
|       | Loss       | 6  | 257064    | 302236    | 45.172    | 254253    | 294826    | 40.573     | 37.762    |
|       | Loss       | 12 | 2235940   | 2257908   | 21.968    | 2235940   | 2257908   | 21.968     | 21.968    |
|       | LossMosaic | 3  | 85614312  | 85723256  | 108.944   | 49650025  | 85978802  | 36328.777  | 108.944   |
|       | LossMosaic | 10 | 34626271  | 34670662  | 44.391    | 100026    | 35377725  | 35277.699  | 44.391    |
| Cell6 | Gain       | 3  | 171650016 | 177896902 | 6246.886  | 93519464  | 197851986 | 104332.522 | 6246.886  |
|       | Gain       | 3  | 189363665 | 189371964 | 8.299     | 93519464  | 197851986 | 104332.522 | 8.299     |
|       | Gain       | 14 | 106251082 | 106728149 | 477.067   | 106206397 | 106728149 | 521.752    | 477.067   |
|       | Gain       | 16 | 34466678  | 34755816  | 289.138   | 34471297  | 34755816  | 284.519    | 284.519   |
|       | Gain       | 17 | 44187491  | 44292676  | 105.185   | 44190670  | 44785015  | 594.345    | 102.006   |
|       | GainMosaic | 1  | 9559062   | 18903819  | 9344.757  | 849466    | 249224684 | 248375.218 | 9344.757  |
|       | GainMosaic | 6  | 257064    | 294826    | 37.762    | 156974    | 41709481  | 41552.507  | 37.762    |
|       | GainMosaic | 17 | 55078940  | 62659557  | 7580.617  | 51032211  | 74219909  | 23187.698  | 7580.617  |
|       | cnLOH      | 1  | 9559062   | 18903819  | 9344.757  | 9559062   | 18903819  | 9344.757   | 9344.757  |
|       | cnLOH      | 3  | 171650016 | 177896902 | 6246.886  | 171650016 | 177969526 | 6319.51    | 6246.886  |
|       | cnLOH      | 6  | 91072976  | 124601694 | 33528.718 | 91072976  | 124601694 | 33528.718  | 33528.718 |
|       | cnLOH      | 7  | 44166     | 20373272  | 20329.106 | 44166     | 20366528  | 20322.362  | 20322.362 |

|       |    |           |           |           |           |           |           |           |
|-------|----|-----------|-----------|-----------|-----------|-----------|-----------|-----------|
| cnLOH | 7  | 6838710   | 6955038   | 116.328   | 44166     | 20366528  | 20322.362 | 116.328   |
| cnLOH | 9  | 7660298   | 19156258  | 11495.96  | 7684316   | 19156258  | 11471.942 | 11471.942 |
| cnLOH | 11 | 13768734  | 29214412  | 15445.678 | 13768734  | 29214412  | 15445.678 | 15445.678 |
| cnLOH | 12 | 87920495  | 106673815 | 18753.32  | 87920495  | 106673815 | 18753.32  | 18753.32  |
| cnLOH | 12 | 118139858 | 128564354 | 10424.496 | 118139858 | 128564354 | 10424.496 | 10424.496 |
| cnLOH | 15 | 22752398  | 39159075  | 16406.677 | 22752398  | 39159075  | 16406.677 | 16406.677 |
| cnLOH | 17 | 55078940  | 62659557  | 7580.617  | 55078940  | 62659557  | 7580.617  | 7580.617  |
| cnLOH | 18 | 3001285   | 10314711  | 7313.426  | 3001285   | 10314711  | 7313.426  | 7313.426  |
| cnLOH | 21 | 30741453  | 48084820  | 17343.367 | 30741453  | 48084820  | 17343.367 | 17343.367 |
| cnLOH | 22 | 16877134  | 28382390  | 11505.256 | 16877134  | 29146503  | 12269.369 | 11505.256 |
| Loss  | 5  | 180378874 | 180430789 | 51.915    | 180378753 | 180430789 | 52.036    | 51.915    |
| Loss  | 6  | 67004972  | 67051189  | 46.217    | 67004972  | 67051189  | 46.217    | 46.217    |
| Loss  | 8  | 18851526  | 18866227  | 14.701    | 18851526  | 18866135  | 14.609    | 14.609    |
| Loss  | 8  | 39247097  | 39386952  | 139.855   | 39247097  | 39384337  | 137.24    | 137.24    |
| Loss  | 12 | 2245848   | 2257908   | 12.06     | 2235940   | 2258395   | 22.455    | 12.06     |
| Loss  | 15 | 39669518  | 39762376  | 92.858    | 39669518  | 39762376  | 92.858    | 92.858    |
| Loss  | 19 | 20598429  | 20720705  | 122.276   | 20596105  | 20720705  | 124.6     | 122.276   |

cnLOH: copy-neutral loss of heterozygosis; kbp: kilo-base pair.
